# Supplementary material for: Isomeric effects on the acidity of Al13 Keggin clusters in porous ionic crystals
Source: Royal Society of Chemistry journal article supplement (doi:10.1039/d1cc03600a), 2021-01-01
Supplement: d1cc03600a1.pdf [file d1cc03600a1.pdf]

Supporting Information for

**Isomeric Effects on the Acidity of Al<sub>13</sub> Keggin Clusters  
in Porous Ionic Crystals**

Wei Zhou,<sup>a</sup> Naoki Ogiwara,<sup>a</sup> Zhewei Weng,<sup>a</sup> Nanako Tamai,<sup>a</sup> Congcong Zhao,<sup>b</sup>

Li-Kai Yan,<sup>b</sup> and Sayaka Uchida\*<sup>a</sup>

<sup>a</sup>Department of Basic Science, School of Arts and Sciences, The University of Tokyo, Komaba, Meguro-ku, Tokyo 153-8902, Japan

<sup>b</sup>Institute of Functional Material Chemistry, Faculty of Chemistry, Northeast Normal University, Changchun 130024, P.R. China.

## Table of contents

| Title                                                                                                                                                                       | Pages       |
|-----------------------------------------------------------------------------------------------------------------------------------------------------------------------------|-------------|
| <b>Experimental Section</b>                                                                                                                                                 | <b>S3–4</b> |
| <b>Table S1.</b> Pinacol to pinacolone rearrangement over various solid catalysts and conditions                                                                            | <b>S5</b>   |
| <b>Table S2.</b> Natural bond orbital (NBO) charges of oxygens in $[\delta\text{-Al}_{13}\text{O}_4(\text{OH})_{24}(\text{H}_2\text{O})_{12}]^{7+}$                         | <b>S6</b>   |
| <b>Table S3.</b> Natural bond orbital (NBO) charges of oxygens in $[\varepsilon\text{-Al}_{13}\text{O}_4(\text{OH})_{24}(\text{H}_2\text{O})_{12}]^{7+}$                    | <b>S7</b>   |
| <b>Table S4.</b> Natural bond orbital (NBO) charges of oxygens in $[\alpha\text{-CoW}_{12}\text{O}_{40}]^{6-}$                                                              | <b>S8</b>   |
| <b>Fig. S1</b> Powder XRD patterns of $\delta\text{-Al}_{13}\text{-CoW}_{12}$ .                                                                                             | <b>S9</b>   |
| <b>Fig. S2</b> Experimental (open circles) and calculated (red solid line) PXRD patterns of $\delta\text{-Al}_{13}\text{-CoW}_{12}$ by the Le Bail method.                  | <b>S9</b>   |
| <b>Fig. S3</b> Thermogravimetry of $\delta\text{-Al}_{13}\text{-CoW}_{12}$ .                                                                                                | <b>S10</b>  |
| <b>Fig. S4</b> IR spectra of $\delta\text{-Al}_{13}\text{-CoW}_{12}$ .                                                                                                      | <b>S10</b>  |
| <b>Fig. S5</b> Calibration curves of (a) Na ( $\lambda = 589.0$ nm) and (b) K ( $\lambda = 766.5$ nm) in AAS.                                                               | <b>S11</b>  |
| <b>Fig. S6</b> Wide scan XPS spectra.                                                                                                                                       | <b>S12</b>  |
| <b>Fig. S7</b> Solid state $^{27}\text{Al}$ -MASNMR spectra.                                                                                                                | <b>S12</b>  |
| <b>Fig. S8</b> Solution $^1\text{H}$ -NMR spectrum (toluene- $d_8$ ) of the filtrate after the pinacol rearrangement catalyzed by $\delta\text{-Al}_{13}\text{-CoW}_{12}$ . | <b>S13</b>  |
| <b>Fig. S9</b> GC chart of the pinacol rearrangement catalyzed by $\delta\text{-Al}_{13}\text{-CoW}_{12}$ .                                                                 | <b>S14</b>  |
| <b>Fig. S10</b> Time course of pinacol rearrangement catalyzed by $\delta\text{-Al}_{13}\text{-CoW}_{12}$ .                                                                 | <b>S15</b>  |
| <b>Fig. S11</b> PXRD patterns of $\delta\text{-Al}_{13}\text{-CoW}_{12}$ . After reaction or evacuation at 373K.                                                            | <b>S15</b>  |
| <b>References</b>                                                                                                                                                           | <b>S16</b>  |

## Experiment Section

**Synthesis.** The solution containing  $[\delta\text{-Al}_{13}\text{O}_4(\text{OH})_{24}(\text{H}_2\text{O})_{12}]^{7+}$  ( $\delta\text{-Al}_{13}$ ) was prepared according to a modification of the preparation of  $[\varepsilon\text{-Al}_{13}\text{O}_4(\text{OH})_{24}(\text{H}_2\text{O})_{12}]^{7+}$  ( $\varepsilon\text{-Al}_{13}$ )<sup>1</sup> as described below. Into 200 mL of water, 12 g of  $\text{AlCl}_3$  was added ( $0.45 \text{ mol L}^{-1} \text{ AlCl}_3(\text{aq})$ ) and stirred at 353 K (solution A). Into 450 mL of water, 4.5 g of  $\text{NaOH}$  was added ( $0.25 \text{ mol L}^{-1} \text{ NaOH}(\text{aq})$ ), and this solution was slowly added to solution A over 15 min under continuous stirring (pH 3.9). Then, the solution was kept at 368 K for another 2 days (pH 3.8) (denoted as  $\delta\text{-Al}_{13}$  solution).  $\text{K}_6[\alpha\text{-CoW}_{12}\text{O}_{40}] \cdot n\text{H}_2\text{O}$  was synthesized according to previous reports.<sup>2,3</sup> The ionic crystal ( $\delta\text{-Al}_{13}\text{-CoW}_{12}$ ) was synthesized as follows: 10 mL of  $6.0 \text{ mmol L}^{-1}$  aqueous solution of  $\text{K}_6[\alpha\text{-CoW}_{12}\text{O}_{40}] \cdot n\text{H}_2\text{O}$  was added to 15 mL of  $\delta\text{-Al}_{13}$  solution containing  $\text{NaCl}$  150 mg (2.5 mmol), followed by immediate and spontaneous precipitation (solution B). Solution B was left under ambient conditions, and blue rod-shaped crystals were obtained through dissolution–recrystallization of the precipitate. The crystals were washed with distilled water three times (yield is 70% based on POM). The ionic crystal  $[\varepsilon\text{-Al}_{13}\text{O}_4(\text{OH})_{24}(\text{H}_2\text{O})_{12}][\alpha\text{-CoW}_{12}\text{O}_{40}](\text{OH}) \cdot 41\text{H}_2\text{O}$  ( $\varepsilon\text{-Al}_{13}\text{-CoW}_{12}$ ) was synthesized and characterized according to our previous work.<sup>1</sup>

**Characterization.** Inductively coupled plasma atomic emission spectroscopy (ICP-AES; Shimadzu, ICPE-9000) was used for the quantitative analysis of inorganic elements (Al, Co, W). Atomic absorption spectroscopy (AAS) analysis (Hitachi, ZA3000) was used for the quantitative analysis of alkali metals. See Fig. S2 for the calibration curves of Na ( $\lambda = 589.0 \text{ nm}$ ) and K ( $\lambda = 766.5 \text{ nm}$ ). Prior to the ICP-AES and AAS measurements, conc.  $\text{HNO}_3$  (1 mL) was added to about 10 mg of the compounds (accurately weighed) to dissolve the solid completely into water (100 mL). According to the elemental analysis and thermogravimetry (Fig. S3), the chemical formula of  $\delta\text{-Al}_{13}\text{-CoW}_{12}$  was determined as follows:  $[\delta\text{-Al}_{13}\text{O}_4(\text{OH})_{24}(\text{H}_2\text{O})_{12}][\alpha\text{-CoW}_{12}\text{O}_{40}](\text{OH}) \cdot 22\text{H}_2\text{O}$ . AAS (Na, K) and ion-exchange chromatography (CI) showed that  $\delta\text{-Al}_{13}\text{-CoW}_{12}$  does not contain Na, K, or Cl (see Fig. S5 and S6 for the details). Elemental analysis for  $\delta\text{-Al}_{13}\text{-CoW}_{12}$  (calcd): Al 8.0 (7.85), Co 1.542(1.32), W 51.8 (49.4). X-ray photoelectron spectroscopy (XPS) was conducted with an PHI5000 VersaProbe (ULVAC-PHI inc.) equipped with an aluminum anode (Al K  $\alpha = 1486.6 \text{ eV}$ ) operating at 25 W. IR spectra were measured by the KBr pellet method with a JASCO FT/IR 4100 spectrometer (JASCO) equipped with a TGS detector. Solid-state  $^{27}\text{Al}$  and  $^1\text{H}$ -MAS NMR spectra were measured with a Bruker AVANCE III 400 WB spectrometer (Bruker) equipped with a 4 mm standard probe operating at 400.18 MHz and a MAS rate of 14 kHz. Thermogravimetry was conducted with a Thermo Plus 2 thermogravimetric analyzer (Rigaku) with  $\alpha\text{-Al}_2\text{O}_3$  as a reference under a dry  $\text{N}_2$  flow ( $100 \text{ mL min}^{-1}$ ) in the temperature range of 303–773 K. Powder XRD patterns were measured with a New ADVANCE D8 X-ray diffractometer (Bruker) by using Cu K $\alpha$  radiation ( $\lambda = 1.54056 \text{ \AA}$ , 40 kV–40 mA) at  $1.8 \text{ deg min}^{-1}$ .  $\delta\text{-Al}_{13}\text{-CoW}_{12}$  was dried in the oven at 373 K for 24 h to remove both the water of crystallization and aqua ligands of  $\delta\text{-Al}_{13}$ , which is denoted as  $\delta\text{-Al}_{13}\text{-CoW}_{12}$  (dried at 373 K). The sizes of the apertures of  $\delta\text{-Al}_{13}\text{-CoW}_{12}$  and  $\varepsilon\text{-Al}_{13}\text{-CoW}_{12}$  were estimated by the void analysis tool of Mercury structure visualization software (CCDC).

**Catalytic Reaction.** Pinacol rearrangement was carried out in a glass reactor equipped with a magnetic stirrer. In a typical run, a mixture of pinacol (0.667 mmol), naphthalene (0.267

mmol, internal standard), and  $\delta\text{-Al}_{13}\text{-CoW}_{12}$  (0.067 mmol) in toluene (2 mL) were stirred under air at 373 K. The reaction progress was followed by gas chromatography using a GC-2014 (Shimadzu) fitted with an InertCap 5 capillary column (GL Sciences) and a flame ionization detector.

**Computation details.** The density functional theory (DFT) calculations were performed using Gaussian 09 program package.<sup>4</sup> The geometric structures of  $[\delta\text{-Al}_{13}\text{O}_4(\text{OH})_{24}(\text{H}_2\text{O})_{12}]^{7+}$ ,  $[\varepsilon\text{-Al}_{13}\text{O}_4(\text{OH})_{24}(\text{H}_2\text{O})_{12}]^{7+}$  and  $[\alpha\text{-CoW}_{12}\text{O}_{40}]^{6-}$  were optimized with B3LYP hybrid functional.<sup>5</sup> The LANL2DZ<sup>6</sup> was applied for Co and W atoms, and 6-31G(d)<sup>7</sup> was used to describe H, O, and Al atoms. The solvent effect was included with the conductor-like polarizable continuum model (CPCM)<sup>8</sup> and water solvent.

**Table S1.** Pinacol to pinacolone rearrangement over various solid catalysts and conditions

| Catalyst                                                                                                     | Temp<br>[K] | Solvent            | Time<br>[h] | Conv.<br>[%] | Selec. <sup>a</sup><br>[%] | Reference |
|--------------------------------------------------------------------------------------------------------------|-------------|--------------------|-------------|--------------|----------------------------|-----------|
| H-ZSM-5                                                                                                      | 393         | -                  | 4           | 80           | 90                         | 1         |
| Ca-HY                                                                                                        | 393         | -                  | 4           | 70           | 88                         | 1         |
| La-HY                                                                                                        | 393         | -                  | 4           | 68           | 82                         | 1         |
| Nafion-H                                                                                                     | 448         | -                  | 0.6         | 92           | 75                         | 2         |
| Fe-AlPO                                                                                                      | 383         | Toluene            | 3           | 69           | 81                         | 3         |
| Ni-AlPO                                                                                                      | 383         | Toluene            | 3           | 50           | 80                         | 3         |
| Cu-AlPO                                                                                                      | 383         | Toluene            | 3           | 54           | 80                         | 3         |
| Fe-ZSM-5                                                                                                     | 383         | Toluene            | 6           | 0            | -                          | 4         |
| Fe-MCM-41                                                                                                    | 383         | Toluene            | 6           | 33           | 64                         | 4         |
| MCM-41                                                                                                       | 383         | Toluene            | 6           | 13           | 14                         | 4         |
| Phosphonate-polysilsesquioxane                                                                               | 413         | -                  | 12          | -            | 80 <sup>d</sup>            | 5         |
| Fe-Na-montmorillonite <sup>b</sup>                                                                           | 398         | -                  | 1           | 34           | 100                        | 6         |
| Al <sub>13</sub> -montmorillonite <sup>b</sup>                                                               | 398         | -                  | 1           | 100          | 100                        | 6         |
| Fe-Al <sub>13</sub> -montmorillonite <sup>b</sup>                                                            | 398         | -                  | 1           | 100          | 100                        | 6         |
| None                                                                                                         | 573–723     | scH <sub>2</sub> O | -           | 100          | 100                        | 8         |
| H <sub>4</sub> SiMo <sub>12</sub> O <sub>40</sub>                                                            | 423         | -                  | 1           | 100          | 44 <sup>c</sup>            | 9         |
| H <sub>3</sub> PMo <sub>12</sub> O <sub>40</sub>                                                             | 423         | -                  | 1           | 100          | 43 <sup>c</sup>            | 9         |
| H <sub>4</sub> SiW <sub>12</sub> O <sub>40</sub>                                                             | 423         | -                  | 1           | 100          | 71                         | 9         |
| H <sub>3</sub> PW <sub>12</sub> O <sub>40</sub>                                                              | 423         | -                  | 1           | 100          | 78                         | 9         |
| [Cr <sub>3</sub> O(OOCPh) <sub>6</sub> (H <sub>2</sub> O)] <sub>4</sub> [SiW <sub>12</sub> O <sub>40</sub> ] | 373         | Toluene            | 12          | 100          | 79                         | 10        |
| [Fe <sub>3</sub> O(OOCPh) <sub>6</sub> (H <sub>2</sub> O)] <sub>4</sub> [SiW <sub>12</sub> O <sub>40</sub> ] | 373         | Toluene            | 6           | 100          | 80                         | 10        |
| Al <sub>2</sub> O <sub>3</sub>                                                                               | 473         | -                  | 1           | 62           | 44                         | 11        |
| Aluminum phosphate                                                                                           | 473         | -                  | 1           | 62           | 46                         | 11        |
| SiO <sub>2</sub>                                                                                             | 473         | -                  | 1           | 34           | 42                         | 11        |
| ZrO <sub>2</sub>                                                                                             | 473         | -                  | 1           | 31           | 44                         | 11        |
| POM6- <i>N</i>                                                                                               | 373         | Toluene            | 40          | 31           | 18                         | 12        |
| POM6- <i>P</i>                                                                                               | 373         | Toluene            | 40          | 76           | 54                         | 12        |
| Al13-sulfate                                                                                                 | 373         | Toluene            | 40          | 4            | 2                          | 12        |
| K <sub>6</sub> CoW <sub>12</sub> O <sub>40</sub>                                                             | 373         | Toluene            | 40          | 6            | 5                          | 12        |
| [Al(Salphen)(H <sub>2</sub> O) <sub>2</sub> ] <sub>3</sub> [PW <sub>12</sub> O <sub>40</sub> ]               | 393         | Toluene            | 24          | 86.9         | 66.6                       | 13        |

a: by-product is 2,3-dimethyl-1,3-butadiene. b: catalyst : reactant = 5 : 1. c: by-product is acetone. (1) *J. Mol. Catal.* 1994, **87**, 39–46. (2) *Tetrahedron* 1994, **50**, 8195–8202. (3) *Microporous Mesoporous Mater.* 1998, **21**, 505–515. (4) *J. Mol. Catal. A: Chemical* 2002, **181**, 189–200. (5) *Chem. Commun.* 2001, 67–68. (6) *J. Chem. Soc. Faraday Trans.* 1997, **93**, 1591–1599. (7) *J. Am. Chem. Soc.* 2002, **124**, 5962–5963. (8) *J. Am. Chem. Soc.* 2000, **122**, 1908–1918. (9) *J. Mol. Catal. A: Chemical.* 1996, **107**, 305–311. (10) *Inorg. Chem.* 2012, **51**, 775–777. (11) *Indian J. Chem. Technol.* 2005, **12**, 447–454. (12) *Cryst. Growth Des.* 2016, **16**, 4968–4974 (13) *Dalton Trans.* 2017, **46**, 3105–3109.

**Table S2** Natural bond orbital (NBO) charges of oxygens in  $[\delta\text{-Al}_3\text{O}_4(\text{OH})_{24}(\text{H}_2\text{O})_{12}]^{7+}$   
(Molecular structure viewed from the (a) frontside and (b) backside)

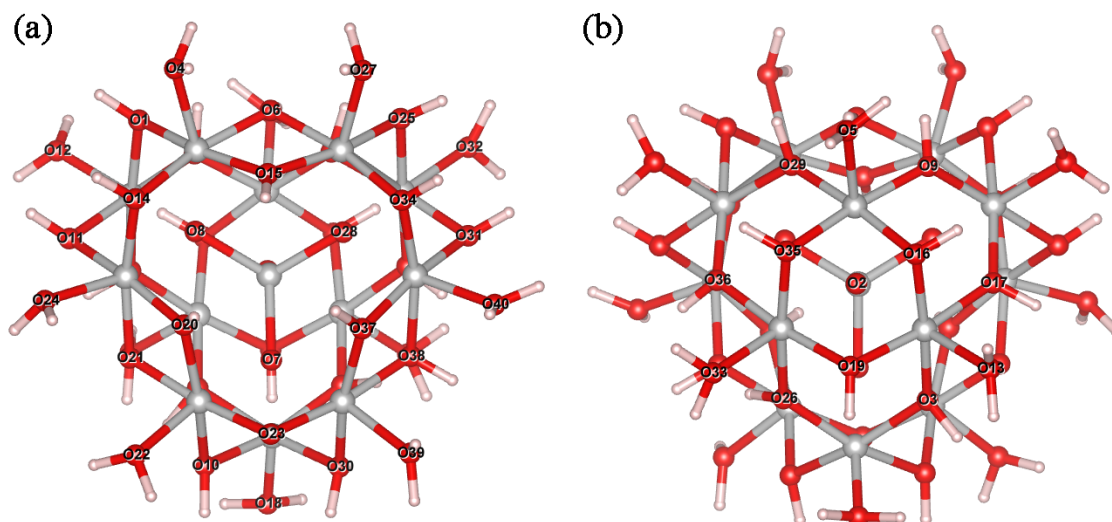

| Atomic number | Charge | Atomic number | Charge |
|---------------|--------|---------------|--------|
| O01           | -1.203 | O21           | -1.181 |
| O02           | -1.467 | O22           | -0.986 |
| O03           | -1.190 | O23           | -1.196 |
| O04           | -0.985 | O24           | -0.987 |
| O05           | -0.994 | O25           | -1.196 |
| O06           | -1.185 | O26           | -1.198 |
| O07           | -1.465 | O27           | -0.986 |
| O08           | -1.463 | O28           | -1.463 |
| O09           | -1.192 | O29           | -1.189 |
| O10           | -1.203 | O30           | -1.195 |
| O11           | -1.196 | O31           | -1.195 |
| O12           | -0.996 | O32           | -0.989 |
| O13           | -0.992 | O33           | -0.990 |
| O14           | -1.192 | O34           | -1.203 |
| O15           | -1.189 | O35           | -1.183 |
| O16           | -1.185 | O36           | -1.195 |
| O17           | -1.188 | O37           | -1.190 |
| O18           | -0.991 | O38           | -1.182 |
| O19           | -1.189 | O39           | -0.989 |
| O20           | -1.185 | O40           | -0.991 |

**Table S3** Natural bond orbital (NBO) charges of oxygens in  $[\epsilon\text{-Al}_{13}\text{O}_4(\text{OH})_{24}(\text{H}_2\text{O})_{12}]^{7+}$   
(Molecular structure viewed from the (a) frontside and (b) backside)

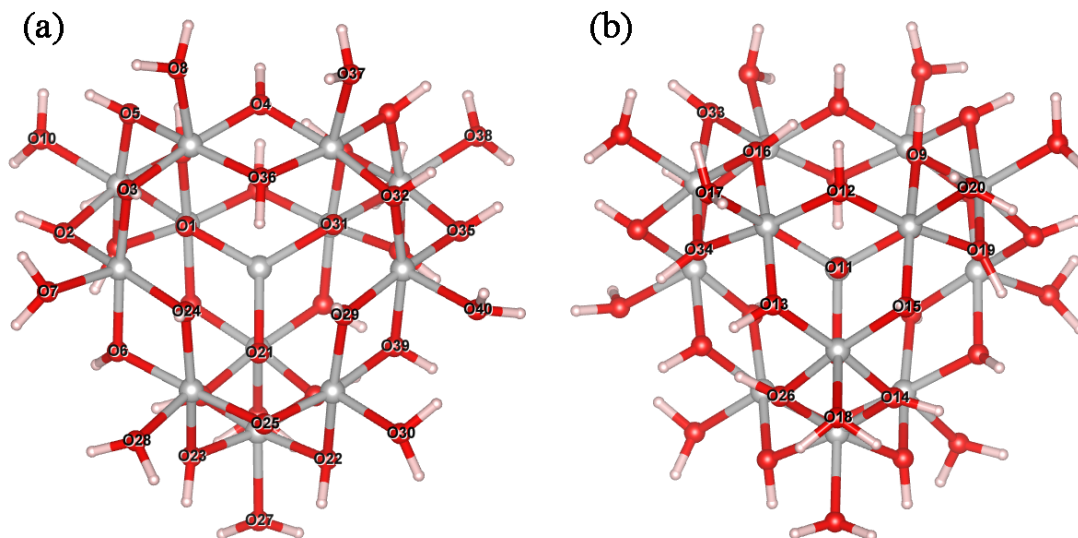

| Atomic number | Charge | Atomic number | Charge |
|---------------|--------|---------------|--------|
| O1            | -1.448 | O21           | -1.449 |
| O2            | -1.188 | O22           | -1.194 |
| O3            | -1.192 | O23           | -1.190 |
| O4            | -1.189 | O24           | -1.196 |
| O5            | -1.194 | O25           | -1.193 |
| O6            | -1.187 | O26           | -1.183 |
| O7            | -0.988 | O27           | -0.987 |
| O8            | -0.986 | O28           | -0.991 |
| O9            | -1.188 | O29           | -1.185 |
| O10           | -0.985 | O30           | -0.985 |
| O11           | -1.449 | O31           | -1.448 |
| O12           | -1.188 | O32           | -1.191 |
| O13           | -1.193 | O33           | -1.195 |
| O14           | -1.190 | O34           | -1.182 |
| O15           | -1.194 | O35           | -1.188 |
| O16           | -1.187 | O36           | -1.182 |
| O17           | -0.983 | O37           | -0.986 |
| O18           | -0.983 | O38           | -0.986 |
| O19           | -1.182 | O39           | -1.192 |
| O20           | -0.982 | O40           | -0.984 |

**Table S4** Natural bond orbital (NBO) charges of oxygens in  $[\alpha\text{-CoW}_{12}\text{O}_{40}]^{6-}$  (Molecular structure viewed from the (a) frontside and (b) backside)

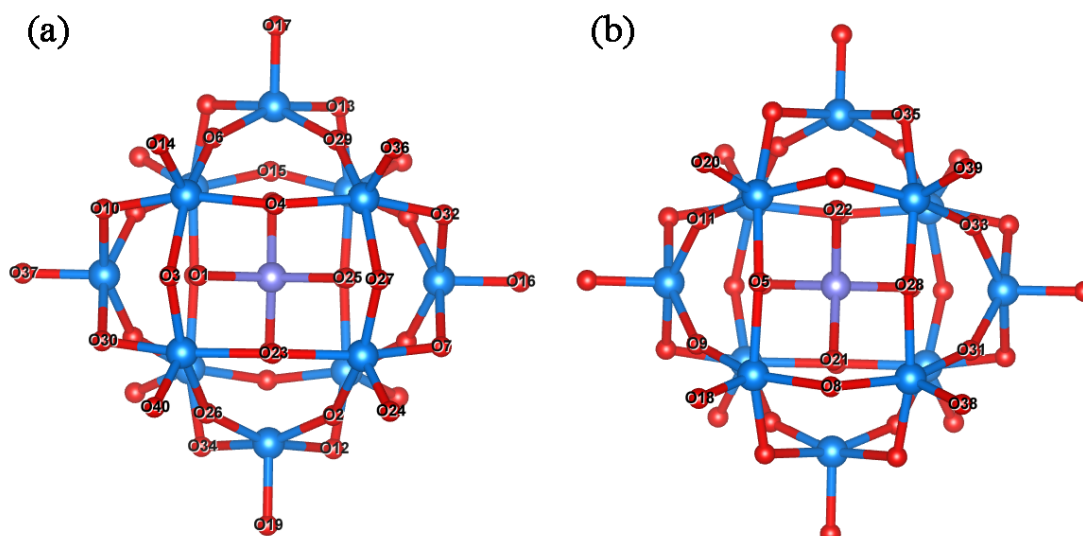

| Atomic number | Charge | Atomic number | Charge |
|---------------|--------|---------------|--------|
| O1            | -0.965 | O21           | -0.965 |
| O2            | -0.687 | O22           | -0.965 |
| O3            | -0.714 | O23           | -0.687 |
| O4            | -0.695 | O24           | -0.580 |
| O5            | -0.693 | O25           | -0.965 |
| O6            | -0.693 | O26           | -0.697 |
| O7            | -0.708 | O27           | -0.708 |
| O8            | -0.712 | O28           | -0.689 |
| O9            | -0.695 | O29           | -0.687 |
| O10           | -0.687 | O30           | -0.704 |
| O11           | -0.687 | O31           | -0.694 |
| O12           | -0.714 | O32           | -0.716 |
| O13           | -0.714 | O33           | -0.689 |
| O14           | -0.581 | O34           | -0.704 |
| O15           | -0.707 | O35           | -0.714 |
| O16           | -0.588 | O36           | -0.588 |
| O17           | -0.581 | O37           | -0.580 |
| O18           | -0.581 | O38           | -0.581 |
| O19           | -0.588 | O39           | -0.588 |
| O20           | -0.581 | O40           | -0.588 |



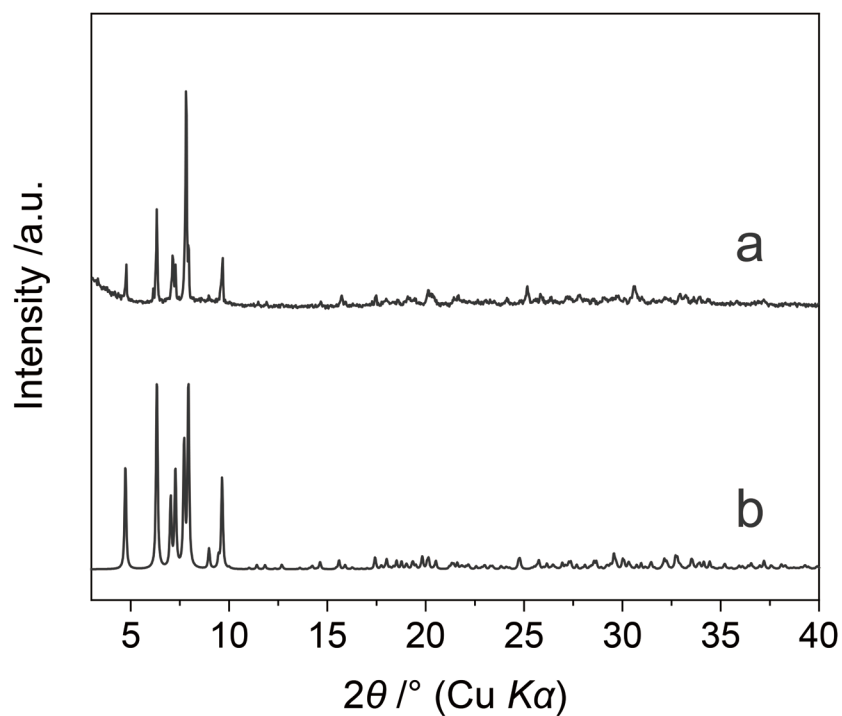

**Fig. S1** PXR D patterns of  $\delta\text{-Al}_{13}\text{-CoW}_{12}$ . (a) Experimental and (b) simulated from the CIF file<sup>9</sup>.

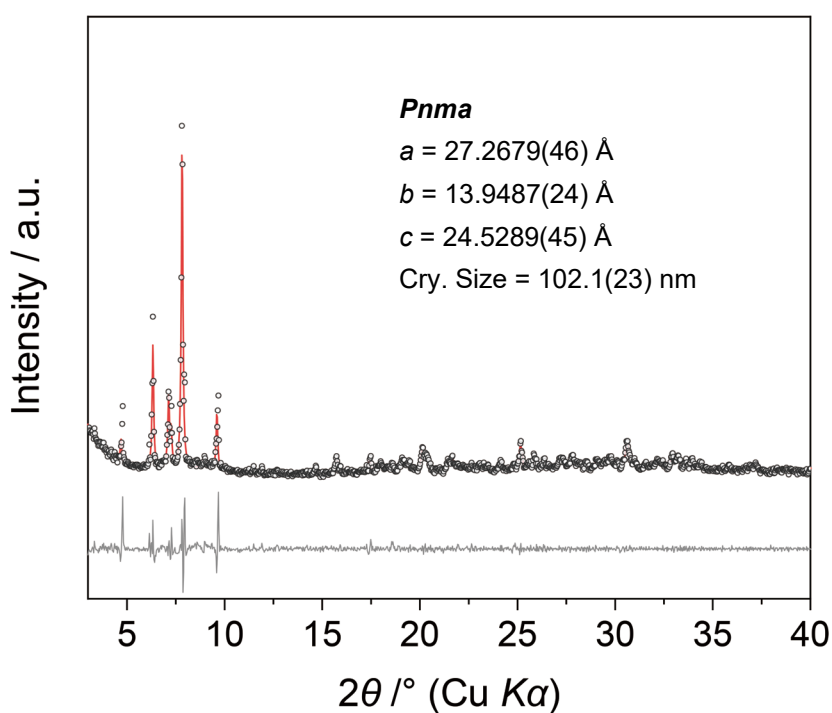

**Fig. S2** Experimental (open circles) and calculated (red solid line) PXR D patterns of  $\delta\text{-Al}_{13}\text{-CoW}_{12}$  by the Le Bail method. The bottom line shows the difference profile.

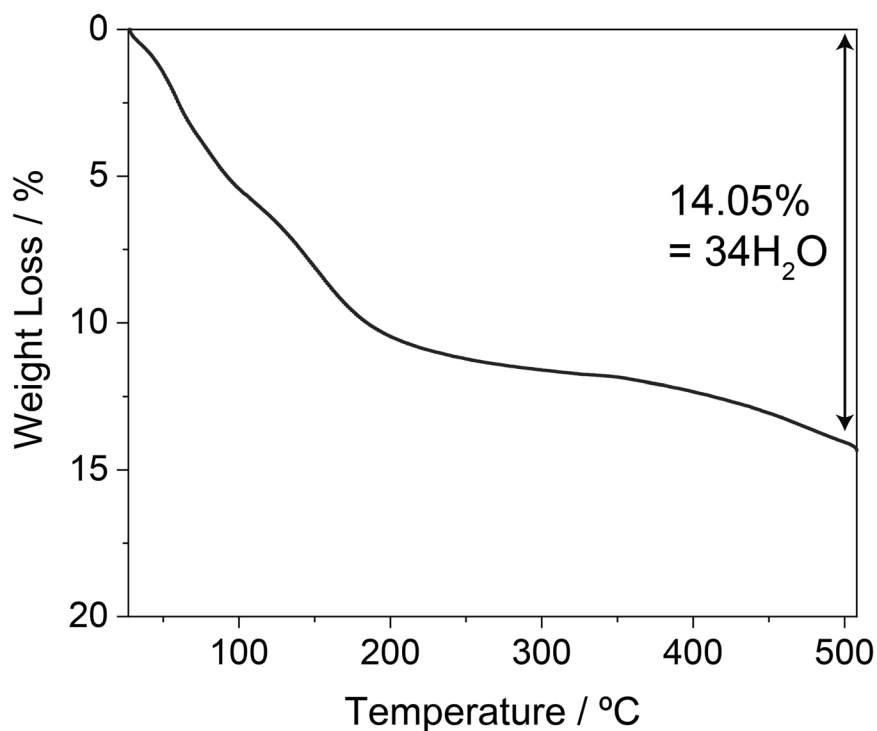

**Fig. S3** TGA curves of  $\delta\text{-Al}_{13}\text{-CoW}_{12}$ . The weight loss after the measurement was 14.05%. Assuming that the water of crystallization in  $\delta\text{-Al}_{13}\text{-CoW}_{12}$  and that the water molecules coordinated to  $\delta\text{-Al}_{13}$  ( $12\text{H}_2\text{O}$ ) are lost after the measurement, the amount of water of crystallization in  $\delta\text{-Al}_{13}\text{-CoW}_{12}$  was determined as  $22\text{H}_2\text{O}$ .

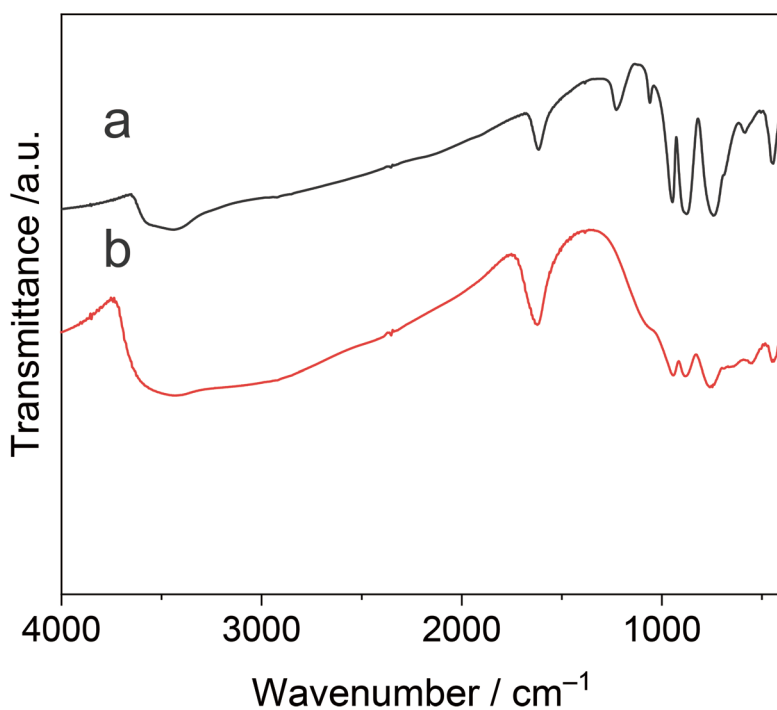

**Fig. S4** IR spectra of (a)  $\delta\text{-Al}_{13}\text{-CoW}_{12}$  and (b)  $\text{K}_6[\alpha\text{-CoW}_{12}\text{O}_{40}] \cdot n\text{H}_2\text{O}$ . KBr pellet ( $\text{cm}^{-1}$ ): 943  $\nu(\text{W}=\text{O})$ , 883  $\nu(\text{W}-\text{O}_c-\text{W})$ , 760  $\nu(\text{W}-\text{O}_c-\text{W}, \text{Al}-\text{O}_{7d})$ , 642  $\nu(\text{Al}-\text{OH}_{oh})$ , 550  $\nu(\text{Al}-\text{OH}_{oh})$ , 441  $\nu(\text{Al}-\text{OH}_{2oh})$ .

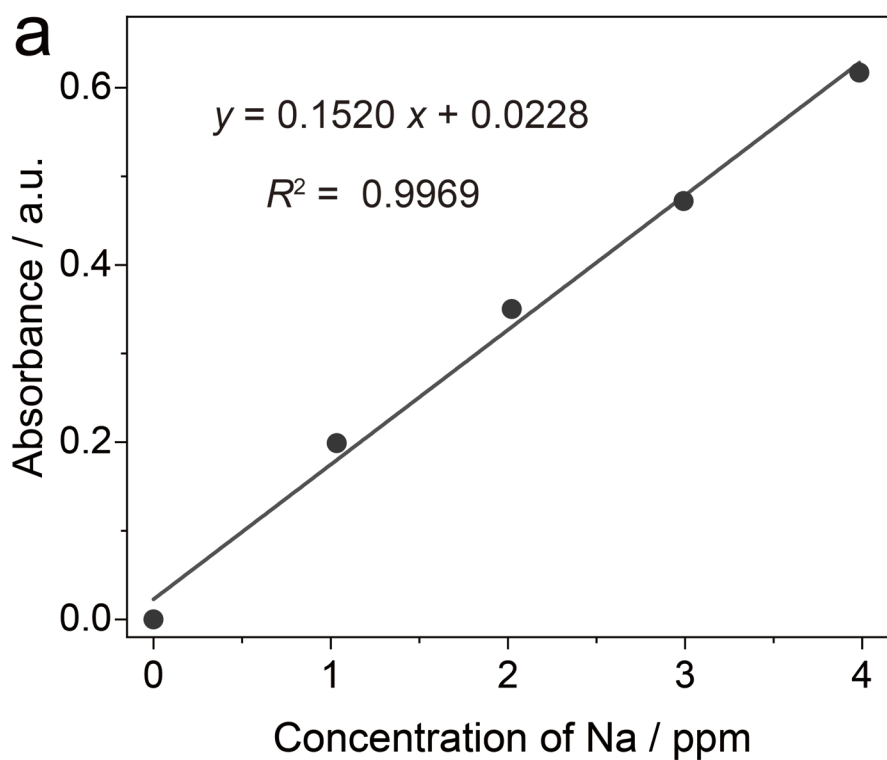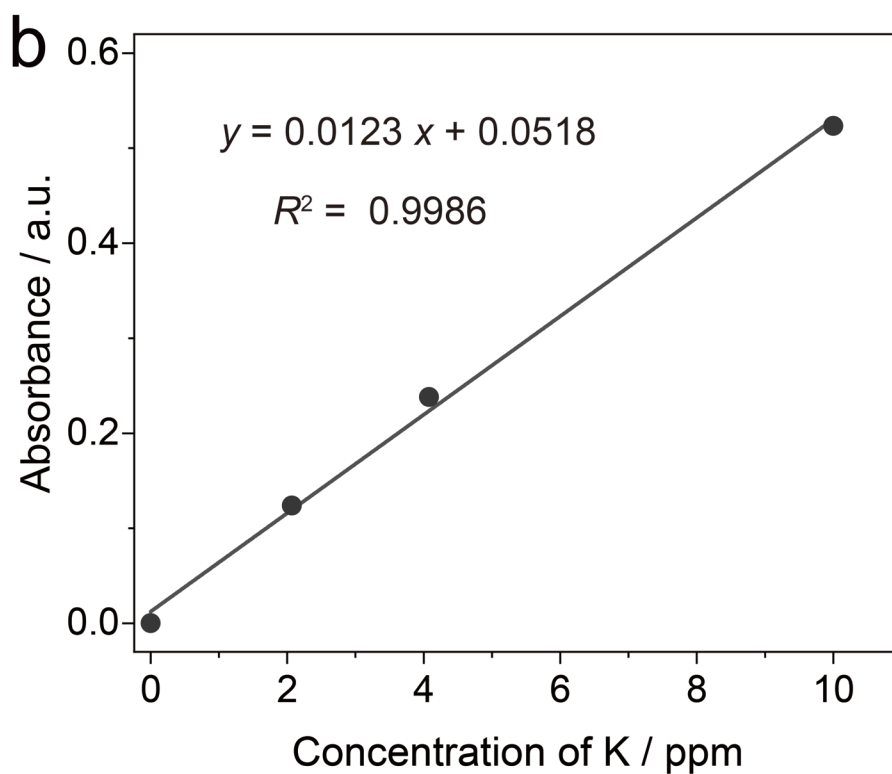

**Fig. S5** Calibration curves of (a) Na ( $\lambda = 589.0$  nm) and (b) K ( $\lambda = 766.5$  nm) in AAS. Absorbance values of the sample solution at  $\lambda = 589.0$  nm and 766.5 nm were 0.0155 and 0.0034, respectively, and were negligible. If one Na<sup>+</sup> or K<sup>+</sup> instead of proton (H<sup>+</sup>) were contained in  $\delta$ -Al<sub>13</sub>-CoW<sub>12</sub>, the concentration of Na or K would be ca. 0.5 ppm and detectable. These results show that  $\delta$ -Al<sub>13</sub>-CoW<sub>12</sub> does not contain these elements.

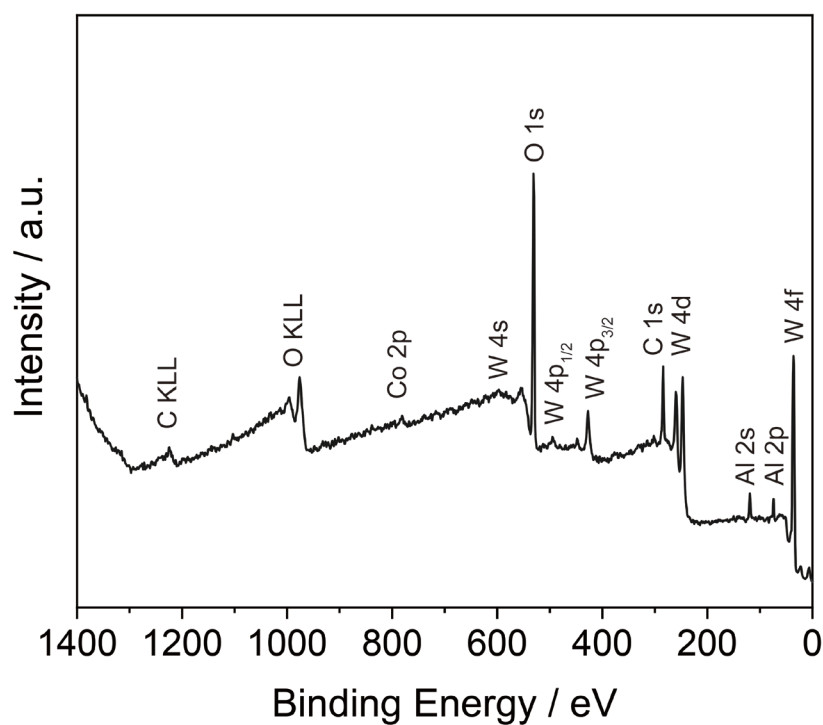

**Fig. S6** Wide scan XPS spectrum of  $\delta$ - $\text{Al}_{13}\text{-CoW}_{12}$ . Note that the Cl 2p signal (around 200 eV) was absent, suggesting that  $\text{Cl}^-$  does not exist to compensate the surplus cation charge. In addition, ion-exchange chromatography measurement showed that Cl is below the detection limit.

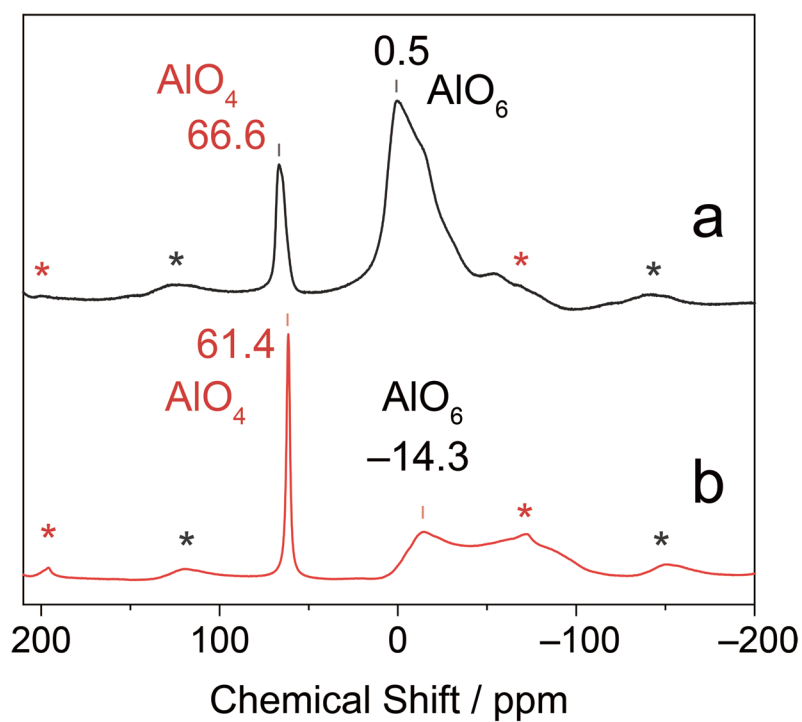

**Fig. S7** Solid-state  $^{27}\text{Al}$ -MASNMR spectra of (a)  $\delta$ - $\text{Al}_{13}\text{-CoW}_{12}$  and (b)  $\epsilon$ - $\text{Al}_{13}\text{-CoW}_{12}$ . Black and red asterisks indicate the spinning side bands (MAS rate = 14 kHz) originating from the signals of  $\text{AlO}_6$  and  $\text{AlO}_4$  sites, respectively.

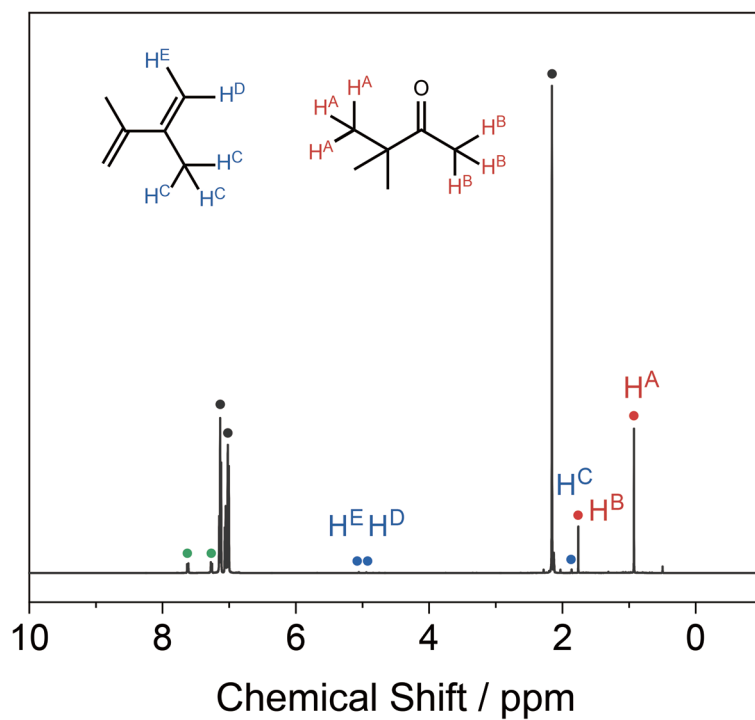

**Fig. S8** Solution  $^1\text{H-NMR}$  spectrum (toluene- $d_8$ ) of the filtrate after the pinacol rearrangement catalyzed by  $\delta\text{-Al}_{13}\text{-CoW}_{12}$ . The signals labelled by red, blue, green, and black circles correspond to pinacolone, 2,3-dimethyl-1,3-butadiene, naphthalene, and toluene, respectively. Reaction conditions: pinacol (0.667 mmol), naphthalene (0.267 mmol), and catalyst (0.067 mmol) in 2 mL toluene at 373 K for 10 h.

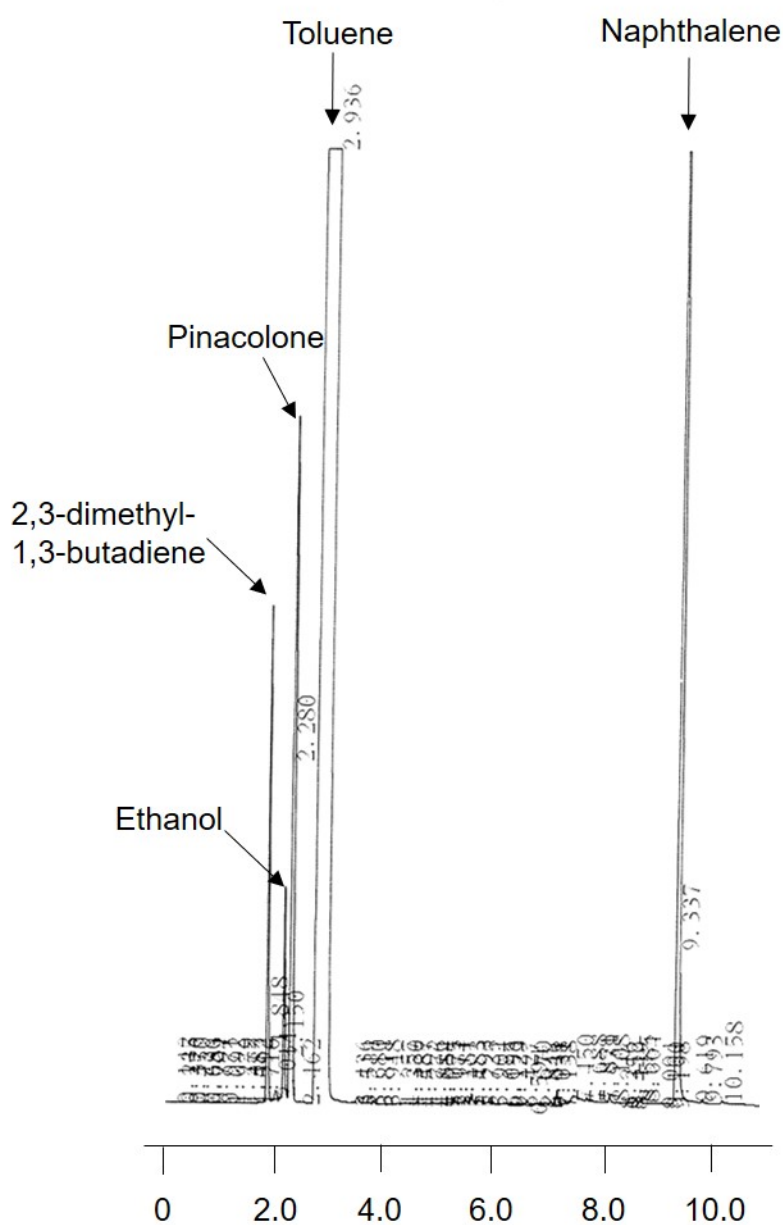

**Fig. S9** GC chart of the pinacol rearrangement catalyzed by  $\delta\text{-AlI}_3\text{-CoW}_{12}$ . The retention times of 2,3-dimethyl-1,3-butadiene, pinacolone, toluene, pinacol, and naphthalene are 1.8, 2.3, 2.9, 7.3, and 9.3 min, respectively. Reaction conditions: pinacol (0.667 mmol), naphthalene (0.267 mmol), and catalyst (0.067 mmol) in 2 mL toluene at 373 K for 10 h. Ethanol is used as a washing solvent.

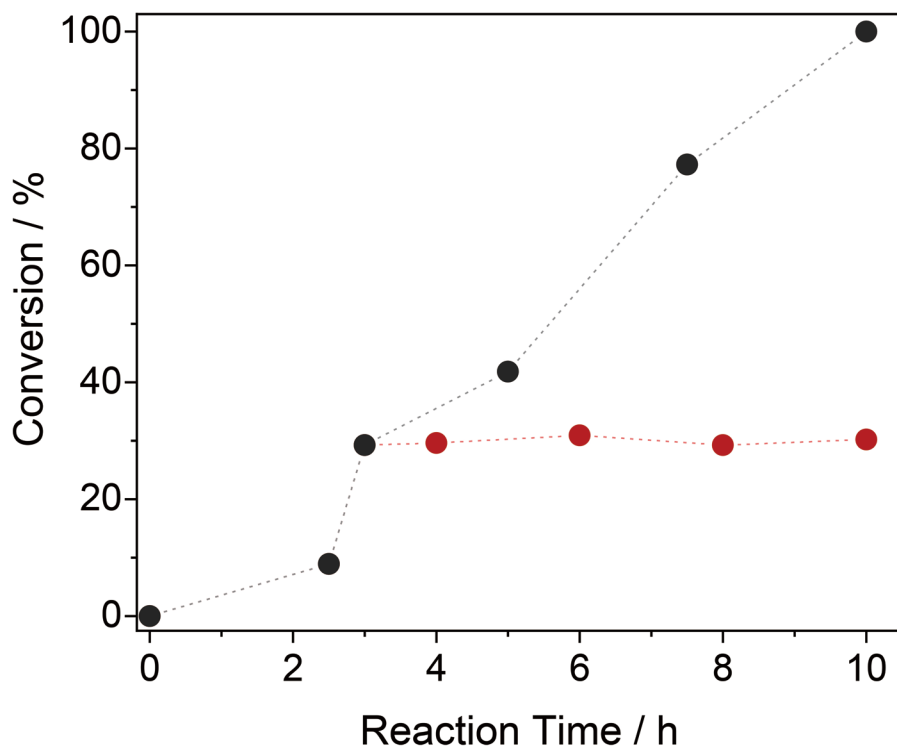

**Fig. S10** Time courses of pinacol rearrangement catalyzed by  $\delta\text{-Al}_{13}\text{-CoW}_{12}$  at 373 K (black) and after removal of the catalyst (red).

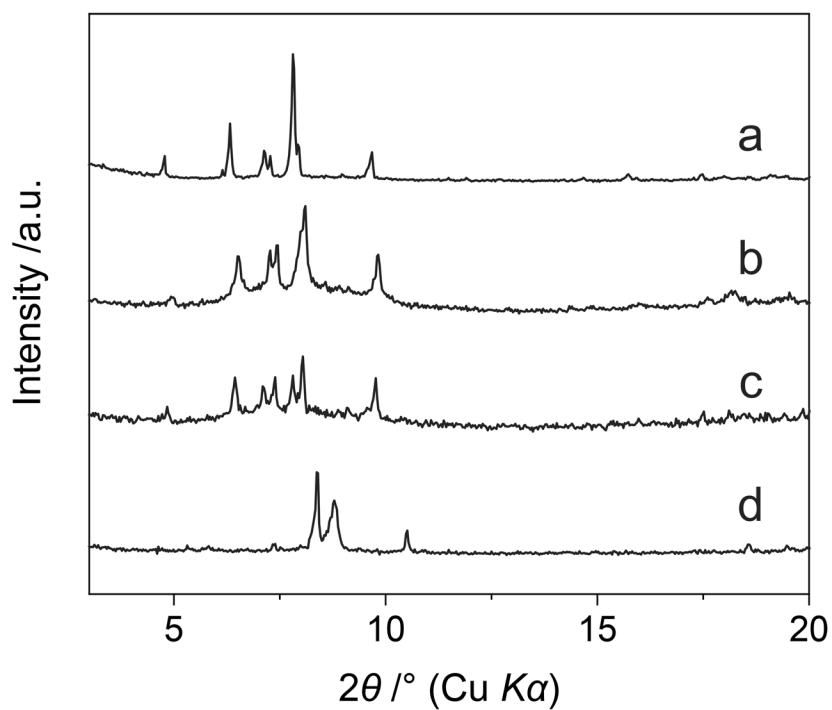

**Fig. S11** PXRD patterns of  $\delta\text{-Al}_{13}\text{-CoW}_{12}$ . (a) As synthesized, (b) after reaction, (c) after reuse, and (d) dried at 373 K for 24 h.

## References

- 1 K. Mizuno, T. Mura, and S. Uchida, *Cryst. Growth Des.*, 2016, **16**, 4968–4974.
- 2 L. C. W. Baker and V. E. Simmons, *J. Am. Chem. Soc.*, 1959, **81**, 4744–4745.
- 3 P. J. Domaille, *J. Am. Chem. Soc.*, 1984, **106**, 7677–7687.
- 4 M. J. Frisch, G. W. Trucks, H. B. Schlegel, G. E. Scuseria, M. A. Robb, J. R. Cheeseman, G. Scalmani, V. Barone, B. Mennucci, G. A. Petersson, H. Nakatsuji, M. Caricato, X. Li, H. P. Hratchian, A. F. Izmaylov, J. Bloino, G. Zheng, J. L. Sonnenberg, M. Hada, M. Ehara, K. Toyota, R. Fukuda, J. Hasegawa, M. Ishida, T. Nakajima, Y. Honda, O. Kitao, H. Nakai, T. Vreven, J. A. Jr. Montgomery, J. E. Peralta, F. Ogliaro, M. Bearpark, J. J. Heyd, E. Brothers, K. N. Kudin, V. N. Staroverov, T. Keith, R. Kobayashi, J. Normand, K. Raghavachari, A. Rendell, J. C. Burant, S. S. Iyengar, J. Tomasi, M. Cossi, N. Rega, J. M. Millam, M. Klene, J. E. Knox, J. B. Cross, V. Bakken, C. Adamo, J. Jaramillo, R. Gomperts, R. E. Stratmann, O. Yazyev, A. J. Austin, R. Cammi, C. Pomelli, J. W. Ochterski, R. L. Martin, K. Morokuma, V. G. Zakrzewski, G. A. Voth, P. Salvador, J. J. Dannenberg, S. Dapprich, A. D. Daniels, O. Farkas, J. B. Foresman, J. V. Ortiz, J. Cioslowski and D. J. Fox, Gaussian 09, Rev. D.01; Gaussian, Inc.: Wallingford, CT, 2013.
- 5 (a) A. D. Becke, *J. Chem. Phys.* 1993, **98**, 5648–5652. (b) C. Lee, C. Yang and R. G. Parr, *Phys. Rev. B*, 1988, **38**, 785–789.
- 6 P. J. Hay and W. R. Wadt, *J. Chem. Phys.*, 1985, **82**, 299–310.
- 7 (a) M. M. Francl, W. J. Pietro, W. J. Hehre, J. S. Binkley, M. S. Gordon, D. J. Defrees and J. A. Pople, *J. Chem. Phys.*, 1982, **77**, 3654–3665. (b) P. C. Hariharan and J. A. Pople, *Theor. Chem. Acc.*, 1973, **28**, 213–222. (c) G. A. Petersson, T. G. Tensfeldt and J. A. Montgomery, *J. Chem. Phys.*, 1991, **94**, 6091–6101.
- 8 J. Tomasi, B. Mennucci and R. Cammi, *Chem. Rev.*, 2005, **105**, 2999–3093.
- 9 J. H. Son, Y.-U. Kwon and O. H. Han, *Inorg. Chem.*, 2003, **42**, 4153–4159.
